# Supplementary material for: FAK loss reduces BRAFV600E-induced ERK phosphorylation to promote intestinal stemness and cecal tumor formation
Source: eLife journal article supplement (doi:10.7554/elife.94605), 2024-04-03
Supplement: fig5-data2 [file elife-94605-fig5-data2-v1.zip]

75

•

•

•

•

—

—

—

•
