# Supplementary material for: FAK loss reduces BRAFV600E-induced ERK phosphorylation to promote intestinal stemness and cecal tumor formation
Source: eLife. 2024 Jun 26;13:RP94605. doi: 10.7554/eLife.94605 (PMC11208045; doi:10.7554/eLife.94605)
Supplement: Supplementary file 1. [file elife-94605-supp1.xlsx]

## Sheet: Case #1 CNV
Chr	Start	End	Ref	Alt	Func.region	Gene.name	Gene.ensemble	Gene.detail	ExonicFunc	AAChange	Otherinfo
chrM	2620	16299	-	<DUP>	intergenic	.	.	.		.

## Sheet: Case #1 INDEL
Chr	Start	End	Ref	Alt	Func.region	Gene.name	Gene.ensemble	Gene.detail	ExonicFunc	AAChange	Otherinfo
chr10	79376150	79376152	CTT	C	upstream	ENSMUSG00000013833	ENSMUSG00000013833	c.-4512	noncoding	.	GT:AD:AF:DP:F1R2:F2R1:SB	0/0:35,0:0.031:35:7,0:22,0:19,16,0,0
chr11	69259977	69259981	TACAC	T	upstream	ENSMUSG00000086591	ENSMUSG00000086591	n.-2072	noncoding	.	GT:AD:AF:DP:F1R2:F2R1:SB	0/0:13,0:0.064:13:5,0:4,0:7,6,0,0
chr12	51591122	51591124	CTT	C	intronic	ENSMUSG00000002688	ENSMUSG00000002688	c.259-96	noncoding	.	GT:AD:AF:DP:F1R2:F2R1:SB	0/0:30,0:0.028:30:15,0:6,0:2,28,0,0
chr2	163429155	163429157	CGG	C	intronic	ENSMUSG00000017679	ENSMUSG00000017679	c.-16+1006	noncoding	.	GT:AD:AF:DP:F1R2:F2R1:SB	0/0:9,0:0.078:9:8,0:1,0:9,0,0,0
chr5	125215007	125215009	GGC	G	intronic	ENSMUSG00000038011	ENSMUSG00000038011	c.1005+34	noncoding	.	GT:AD:AF:DP:F1R2:F2R1:SB	0/0:81,0:0.014:81:29,0:51,0:21,60,0,0
chr8	13085173	13085177	GCTCT	G	upstream	ENSMUSG00000091784	ENSMUSG00000091784	n.-1343	noncoding	.	GT:AD:AF:DP:F1R2:F2R1:SB	0/0:25,0:0.037:25:13,0:10,0:24,1,0,0
chr9	109050322	109050324	CAA	C	intronic	ENSMUSG00000047237	ENSMUSG00000047237	c.621+209	noncoding	.	GT:AD:AF:DP:F1R2:F2R1:SB	0/0:11,0:0.075:11:8,0:3,0:11,0,0,0

## Sheet: Case #1 SNV
Chr	Start	End	Ref	Alt	Func.region	Gene.name	Gene.ensemble	Gene.detail	ExonicFunc	AAChange	Otherinfo
chr10	28749908	28749908	C	T	intergenic	ENSMUSG00000015519-ENSMUSG00000056316	ENSMUSG00000015519-ENSMUSG00000056316	n.28749908C>T	noncoding	.	GT:AD:AF:DP:F1R2:F2R1:SB	0/0:69,0:0.018:69:30,0:38,0:50,19,0,0
chr11	52209959	52209959	C	T	UTR5	ENSMUSG00000036275	ENSMUSG00000036275	c.-11C>T	noncoding	.	GT:AD:AF:DP:F1R2:F2R1:SB	0/0:87,0:0.016:87:42,0:44,0:48,39,0,0
chr13	14340822	14340822	T	G	intronic	ENSMUSG00000021301	ENSMUSG00000021301	c.4014-113A>C	noncoding	.	GT:AD:AF:DP:F1R2:F2R1:SB	0/0:35,0:0.027:35:17,0:18,0:0,35,0,0
chr14	79613183	79613183	T	A	exonic	ENSMUSG00000071262	ENSMUSG00000071262	c.982A>T	missense	p.Thr328Ser	GT:AD:AF:DP:F1R2:F2R1:PGT:PID:PS:SB	0|0:372,0:3.200e-03:372:174,0:187,0:0|1:79613183_T_A:79613183:176,196,0,0
chr14	79613186	79613186	T	C	exonic	ENSMUSG00000071262	ENSMUSG00000071262	c.979A>G	missense	p.Thr327Ala	GT:AD:AF:DP:F1R2:F2R1:PGT:PID:PS:SB	0|0:368,0:3.237e-03:368:167,0:174,0:0|1:79613183_T_A:79613183:174,194,0,0
chr19	7304228	7304228	G	A	exonic	ENSMUSG00000024764	ENSMUSG00000024764	c.478C>T	stopgain	p.Gln160*	GT:AD:AF:DP:F1R2:F2R1:SB	0/0:176,0:8.475e-03:176:96,0:80,0:91,85,0,0
chr19	44585631	44585631	A	C	intronic	ENSMUSG00000036961	ENSMUSG00000036961	c.419-91A>C	noncoding	.	GT:AD:AF:DP:F1R2:F2R1:SB	0/0:16,0:0.056:16:6,0:7,0:9,7,0,0
chr5	86626916	86626916	C	T	UTR5	ENSMUSG00000029255	ENSMUSG00000029255	c.-66G>A	noncoding	.	GT:AD:AF:DP:F1R2:F2R1:SB	0/0:147,0:7.880e-03:147:67,0:77,0:27,120,0,0
chr5	129528897	129528897	G	A	UTR3	ENSMUSG00000029430	ENSMUSG00000029430	c.*204G>A	noncoding	.	GT:AD:AF:DP:F1R2:F2R1:SB	0/0:19,0:0.047:19:9,0:8,0:0,19,0,0

## Sheet: Case #2 CNV
Chr	Start	End	Ref	Alt	Func.region	Gene.name	Gene.ensemble	Gene.detail	ExonicFunc	AAChange	Otherinfo
chr10	128482922	129917333	-	<DUP>	intergenic	.	.	.		.
chr17	17667145	23616835	-	<DUP>	intergenic	.	.	.		.
chr4	111570849	113917750	-	<DUP>	intergenic	.	.	.		.
chr4	145057524	147050465	-	<DUP>	intergenic	.	.	.		.
chr5	14911060	15220197	-	<DUP>	intergenic	.	.	.		.
chrM	2620	16299	-	<DUP>	intergenic	.	.	.		.

## Sheet: Case #2 INDEL
Chr	Start	End	Ref	Alt	Func.region	Gene.name	Gene.ensemble	Gene.detail	ExonicFunc	AAChange	Otherinfo
chr11	101445730	101445734	TTCTC	T	upstream	ENSMUSG00000034947	ENSMUSG00000034947	n.-1580	noncoding	.	GT:AD:AF:DP:F1R2:F2R1:SB	0/0:58,0:0.026:58:24,0:23,0:29,29,0,0
chr14	37859868	37859872	ATGTG	A	intronic	ENSMUSG00000021804	ENSMUSG00000021804	c.236+155	noncoding	.	GT:AD:AF:DP:F1R2:F2R1:SB	0/0:10,0:0.078:10:2,0:8,0:10,0,0,0
chr14	63796375	63796379	GACAT	G	downstream	ENSMUSG00000035121	ENSMUSG00000035121	c.*5709	noncoding	.	GT:AD:AF:DP:F1R2:F2R1:PGT:PID:PS:SB	0|0:20,0:0.048:20:6,0:9,0:0|1:63796375_GACAT_G:63796375:19,1,0,0
chr14	63796381	63796388	GCCCTAGT	G	downstream	ENSMUSG00000035121	ENSMUSG00000035121	c.*5700	noncoding	.	GT:AD:AF:DP:F1R2:F2R1:PGT:PID:PS:SB	0|0:25,0:0.038:25:8,0:12,0:0|1:63796375_GACAT_G:63796375:24,1,0,0
chr16	30547676	30547680	GCACA	G	intronic	ENSMUSG00000022537	ENSMUSG00000022537	c.138-125	noncoding	.	GT:AD:AF:DP:F1R2:F2R1:SB	0/0:26,0:0.030:26:12,0:9,0:1,25,0,0
chr16	35022796	35022796	G	GGTCGGACCCGCAGCCC	intronic	ENSMUSG00000035376	ENSMUSG00000035376	c.155+75	noncoding	.	GT:AD:AF:DP:F1R2:F2R1:PGT:PID:PS:SB	0|0:27,0:0.082:27:16,0:10,0:0|1:35022796_G_GGTCGGACCCGCAGCCC:35022796:6,21,0,0
chr18	44572045	44572049	TTGTG	T	intronic	ENSMUSG00000024472	ENSMUSG00000024472	c.943-124	noncoding	.	GT:AD:AF:DP:F1R2:F2R1:SB	0/0:16,0:0.054:16:3,0:9,0:16,0,0,0
chr2	27242128	27242132	TAGAG	T	splicing	ENSMUSG00000009621	ENSMUSG00000009621	c.205-6	noncoding	.	GT:AD:AF:DP:F1R2:F2R1:SB	0/0:23,0:0.034:23:14,0:8,0:1,22,0,0
chr2	69579713	69579719	AAGAAGG	A	exonic	ENSMUSG00000042133	ENSMUSG00000042133	c.724	noncoding	p.Glu242	GT:AD:AF:DP:F1R2:F2R1:PGT:PID:PS:SB	0|0:53,0:0.020:53:30,0:23,0:0|1:69579703_C_T:69579703:7,46,0,0
chr7	25332651	25332655	CGTGT	C	upstream	ENSMUSG00000011632	ENSMUSG00000011632	c.-1643	noncoding	.	GT:AD:AF:DP:F1R2:F2R1:SB	0/0:31,0:0.029:31:20,0:11,0:31,0,0,0
chr7	125818009	125818013	ATGTG	A	intronic	ENSMUSG00000030650	ENSMUSG00000030650	c.2858-121	noncoding	.	GT:AD:AF:DP:F1R2:F2R1:SB	0/0:30,0:0.031:30:13,0:11,0:28,2,0,0

## Sheet: Case #2 SNV
Chr	Start	End	Ref	Alt	Func.region	Gene.name	Gene.ensemble	Gene.detail	ExonicFunc	AAChange	Otherinfo
chr11	120476573	120476573	C	T	upstream	ENSMUSG00000025137	ENSMUSG00000025137	n.-3150G>A	noncoding	.	GT:AD:AF:DP:F1R2:F2R1:SB	0/0:69,0:0.016:69:35,0:34,0:55,14,0,0
chr11	121806909	121806909	G	A	exonic	ENSMUSG00000078564	ENSMUSG00000078564	c.117C>T	synonymous	p.Phe39Phe	GT:AD:AF:DP:F1R2:F2R1:SB	0/0:166,0:7.835e-03:166:85,0:80,0:68,98,0,0
chr17	23497180	23497180	G	C	downstream	ENSMUSG00000091076	ENSMUSG00000091076	c.*85G>C	noncoding	.	GT:AD:AF:DP:F1R2:F2R1:SB	0/0:13,0:0.067:13:9,0:4,0:0,13,0,0
chr1	85091175	85091175	G	T	downstream	ENSMUSG00000089844	ENSMUSG00000089844	c.*4877C>A	noncoding	.	GT:AD:AF:DP:F1R2:F2R1:SB	0/0:12,0:0.068:12:9,0:3,0:0,12,0,0
chr2	69579703	69579703	C	T	exonic	ENSMUSG00000042133	ENSMUSG00000042133	c.708C>T	synonymous	p.Ser236Ser	GT:AD:AF:DP:F1R2:F2R1:PGT:PID:PS:SB	0|0:59,0:0.019:59:31,0:26,0:0|1:69579703_C_T:69579703:11,48,0,0
