# Supplementary figures and images for: FAK loss reduces BRAFV600E-induced ERK phosphorylation to promote intestinal stemness and cecal tumor formation (part 1 of 2)
Source: eLife journal article supplement (doi:10.7554/elife.94605), 2024-04-03

B Bc F13C

75

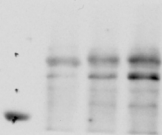

Supplement: fig4-data2 [file elife-94605-fig4-data2-v1.zip]

B BC FBC

CLIP 1271

(For Lgr4)

37

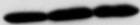

from same  
member

Supplement: fig4-data2 [file elife-94605-fig4-data2-v1.zip]

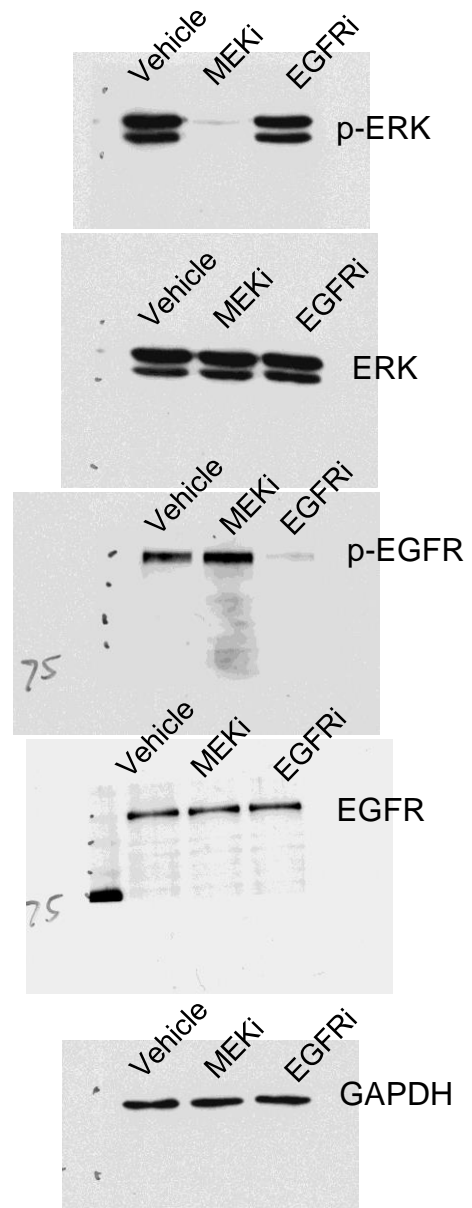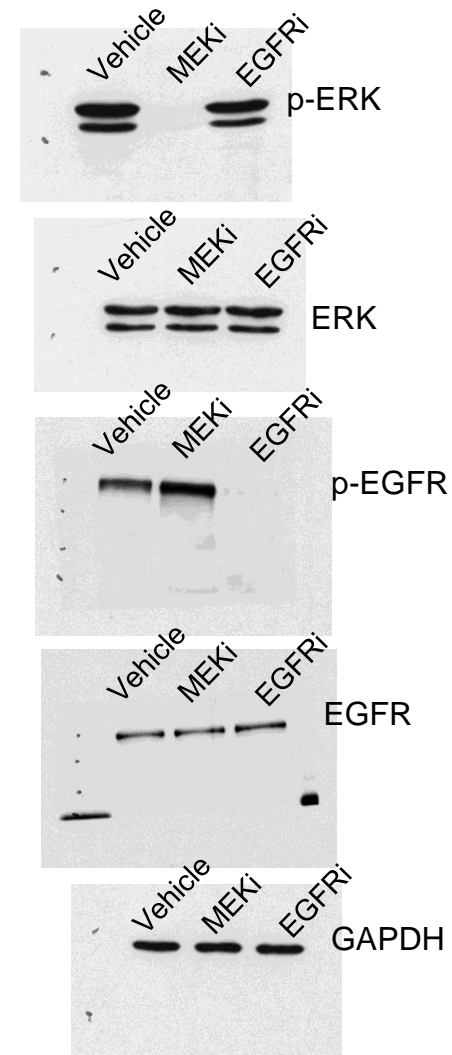

Supplement: fig5-data1 [file elife-94605-fig5-data1-v1.zip]

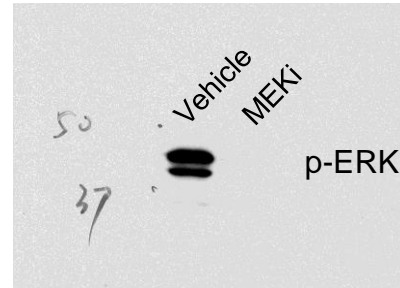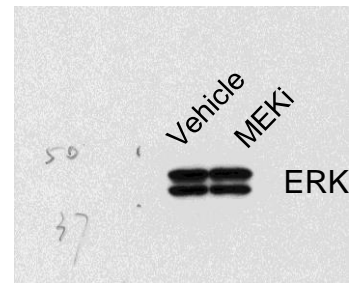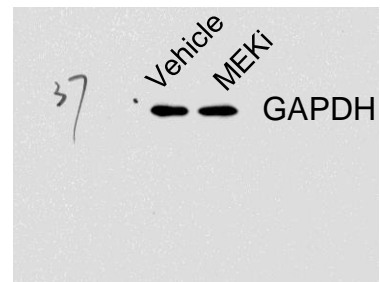

Supplement: fig5-data1 [file elife-94605-fig5-data1-v1.zip]

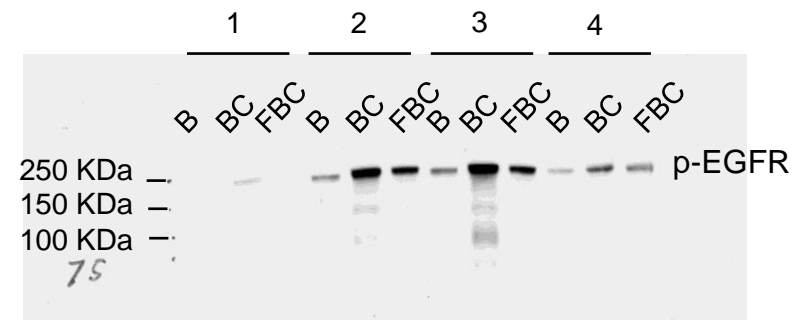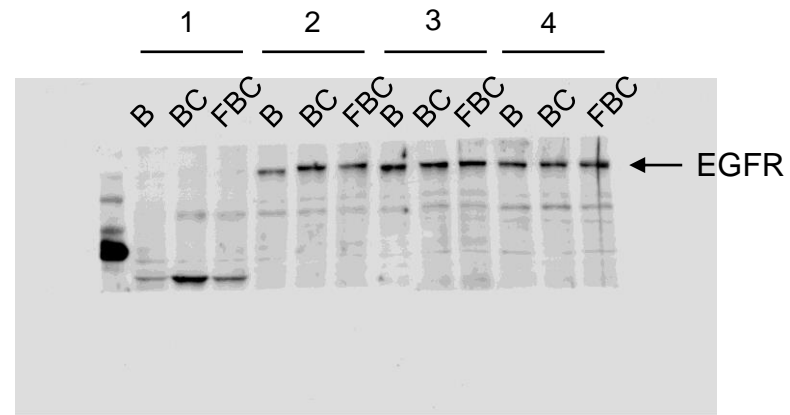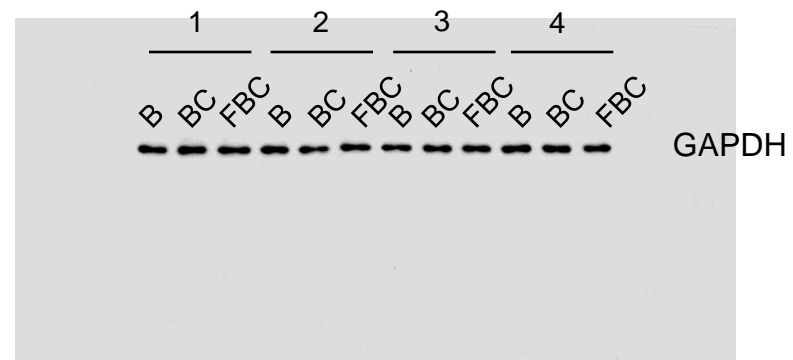

Supplement: fig5-data1 [file elife-94605-fig5-data1-v1.zip]

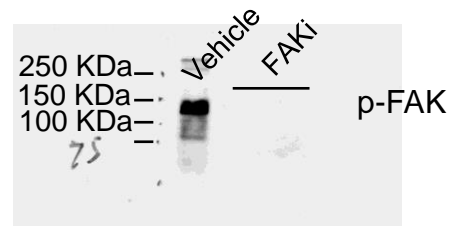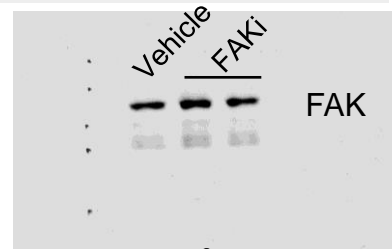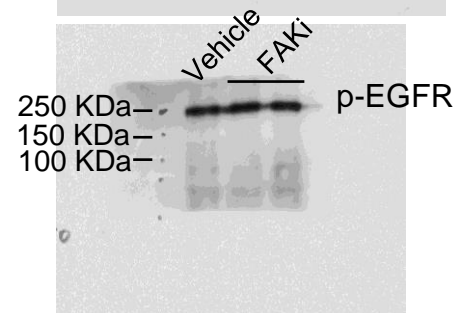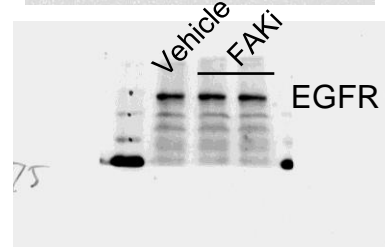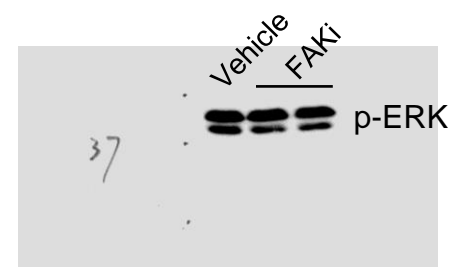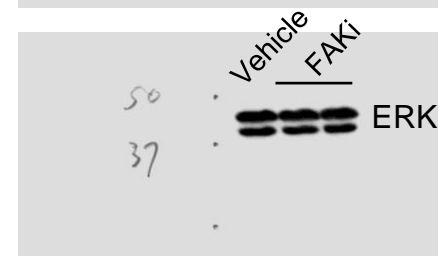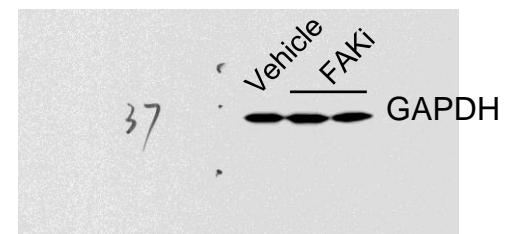

Supplement: fig5-data1 [file elife-94605-fig5-data1-v1.zip]

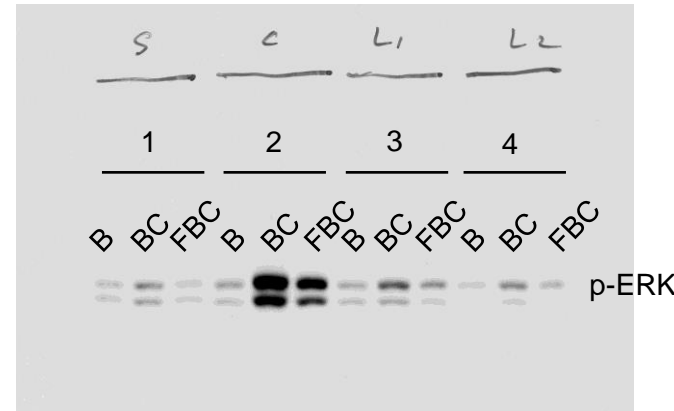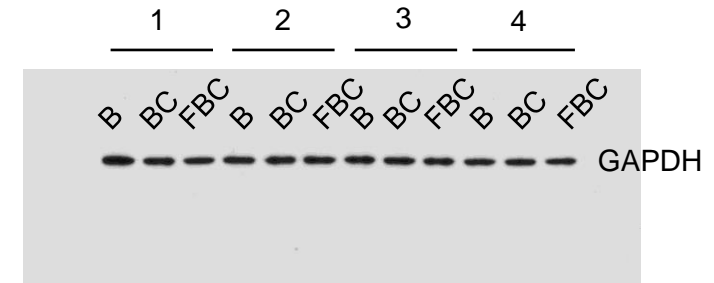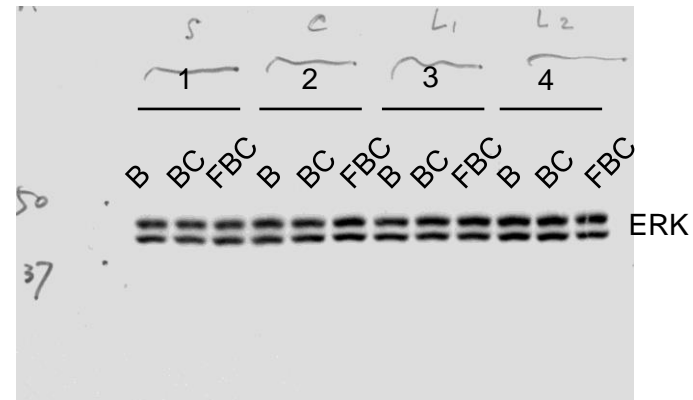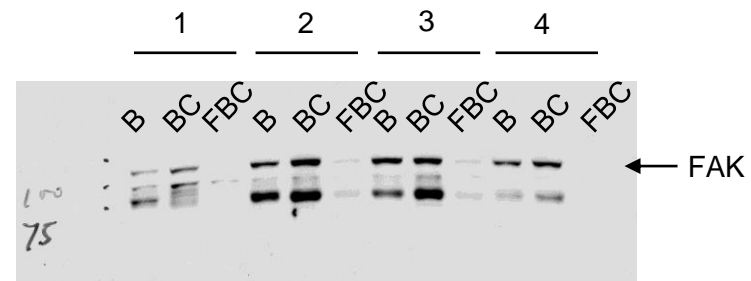

Supplement: fig5-data1 [file elife-94605-fig5-data1-v1.zip]

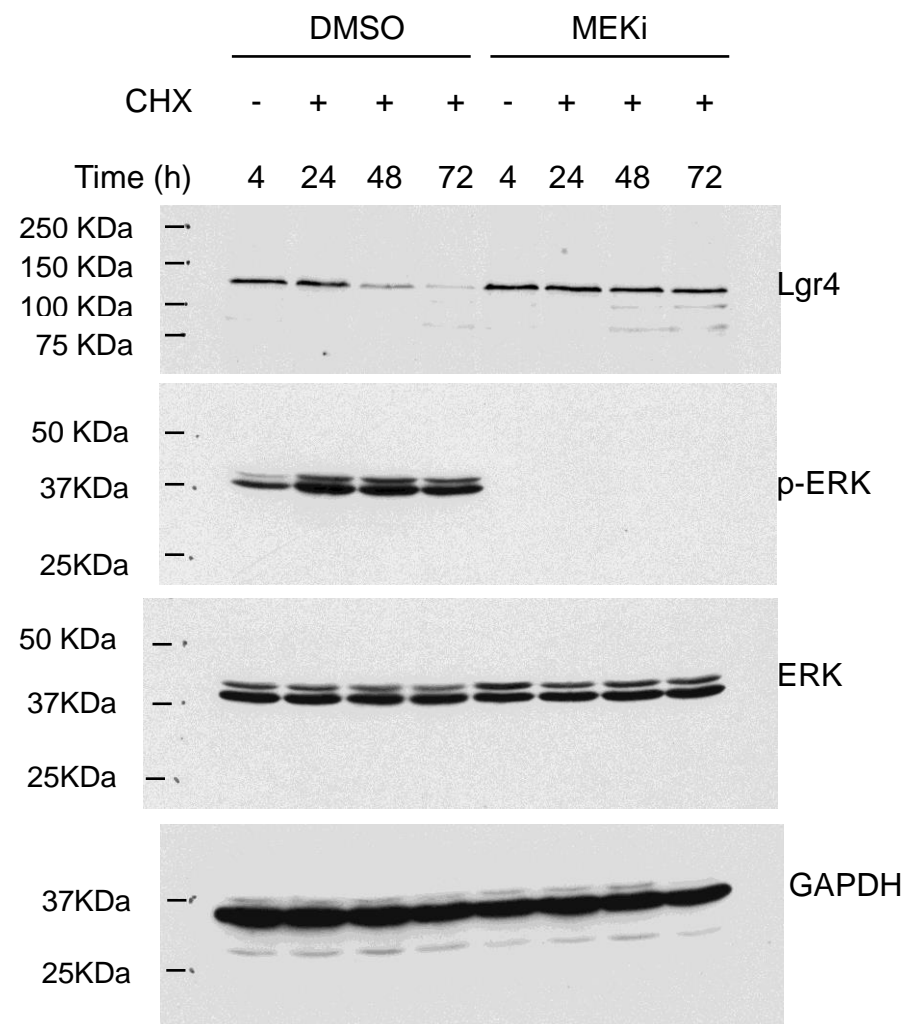

Supplement: fig5-data1 [file elife-94605-fig5-data1-v1.zip]

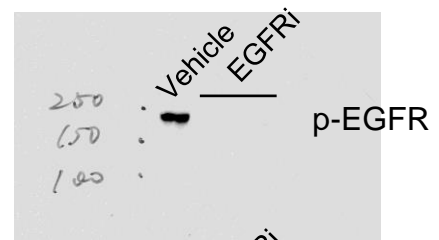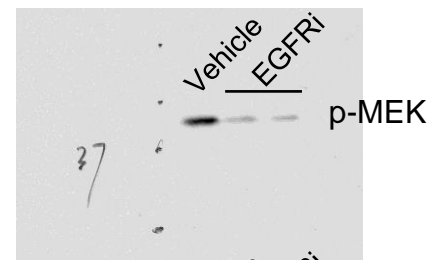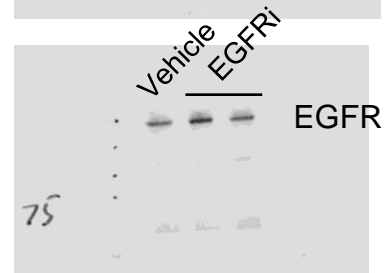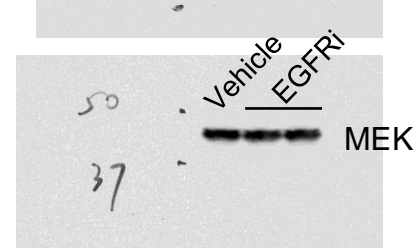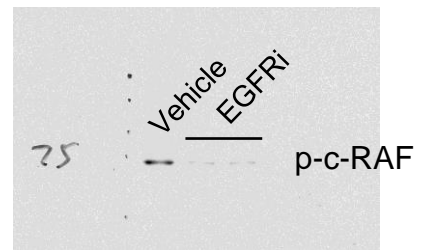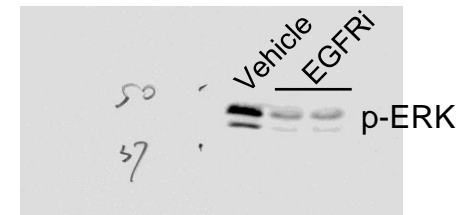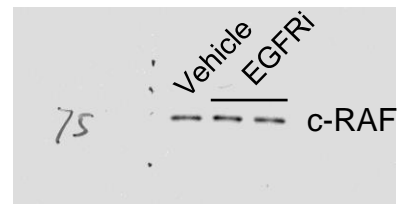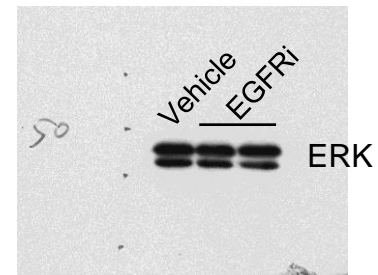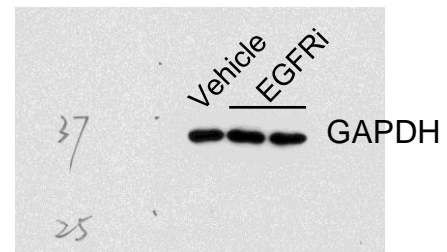

Supplement: fig5-data1 [file elife-94605-fig5-data1-v1.zip]

S C L<sub>1</sub> L<sub>2</sub>

\_\_\_\_\_

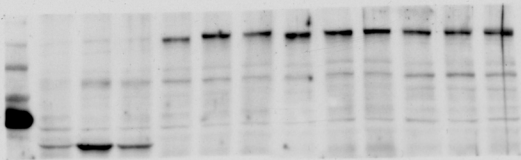

Supplement: fig5-data2 [file elife-94605-fig5-data2-v1.zip]

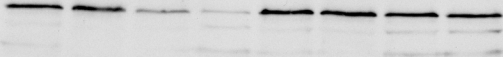

Supplement: fig5-data2 [file elife-94605-fig5-data2-v1.zip]

extr

75

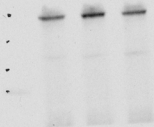

Supplement: fig5-data2 [file elife-94605-fig5-data2-v1.zip]

erk

Bc ~~Bc~~ + FAK?

1 2

50

37

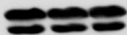

Supplement: fig5-data2 [file elife-94605-fig5-data2-v1.zip]

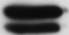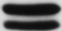

Supplement: fig5-data2 [file elife-94605-fig5-data2-v1.zip]

250

.

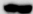

150

.

100

.

Supplement: fig5-data2 [file elife-94605-fig5-data2-v1.zip]

S C L<sub>1</sub> L<sub>2</sub>

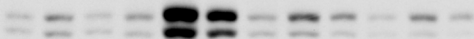

Supplement: fig5-data2 [file elife-94605-fig5-data2-v1.zip]

BC BC + FAKi 4h  
1 2  

---

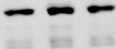

Supplement: fig5-data2 [file elife-94605-fig5-data2-v1.zip]

p-erk

BC + F/1/C 4h  
BC    1    2  
\_\_\_\_\_

37

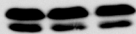

Supplement: fig5-data2 [file elife-94605-fig5-data2-v1.zip]

6.14.202

(identical to  
6.13.21 1068)

p-estr 1068

BC

BC + FALC

1 2

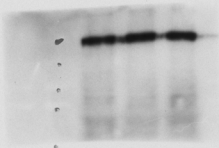

50

Supplement: fig5-data2 [file elife-94605-fig5-data2-v1.zip]

37

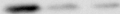

Supplement: fig5-data2 [file elife-94605-fig5-data2-v1.zip]

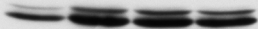

Supplement: fig5-data2 [file elife-94605-fig5-data2-v1.zip]

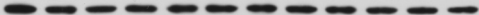

Supplement: fig5-data2 [file elife-94605-fig5-data2-v1.zip]

75

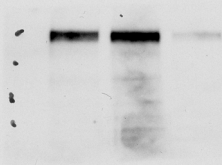

Supplement: fig5-data2 [file elife-94605-fig5-data2-v1.zip]

50

57

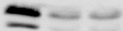

Supplement: fig5-data2 [file elife-94605-fig5-data2-v1.zip]

5280  
6225

PAK

S

C

L<sub>1</sub>

L<sub>2</sub>

100  
75

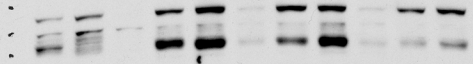

Supplement: fig5-data2 [file elife-94605-fig5-data2-v1.zip]

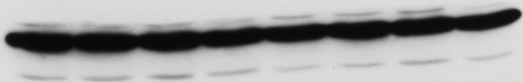

Supplement: fig5-data2 [file elife-94605-fig5-data2-v1.zip]

p-er/c

BC BC + mZ/ci

50

37

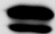

Supplement: fig5-data2 [file elife-94605-fig5-data2-v1.zip]

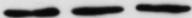

Supplement: fig5-data2 [file elife-94605-fig5-data2-v1.zip]

p-FAK 397

BC

BC+FAK: 4h

1 2

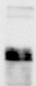

75

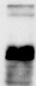

Supplement: fig5-data2 [file elife-94605-fig5-data2-v1.zip]

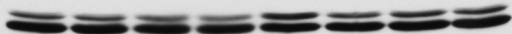

Supplement: fig5-data2 [file elife-94605-fig5-data2-v1.zip]

BC + FALC 1

BC —

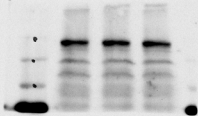

75

Supplement: fig5-data2 [file elife-94605-fig5-data2-v1.zip]

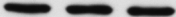

Supplement: fig5-data2 [file elife-94605-fig5-data2-v1.zip]

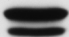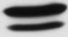

Supplement: fig5-data2 [file elife-94605-fig5-data2-v1.zip]

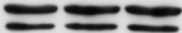

Supplement: fig5-data2 [file elife-94605-fig5-data2-v1.zip]

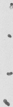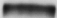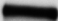

Supplement: fig5-data2 [file elife-94605-fig5-data2-v1.zip]

52

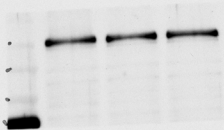

Supplement: fig5-data2 [file elife-94605-fig5-data2-v1.zip]

50

37

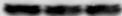

Supplement: fig5-data2 [file elife-94605-fig5-data2-v1.zip]

37

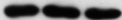

25

Supplement: fig5-data2 [file elife-94605-fig5-data2-v1.zip]

GAPDH

BC

BC + FAKi

1 2

37

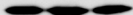

Supplement: fig5-data2 [file elife-94605-fig5-data2-v1.zip]

p-estr.  
1568

12 lanes

75

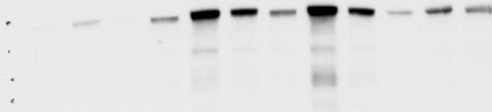

Supplement: fig5-data2 [file elife-94605-fig5-data2-v1.zip]

50

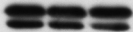

Supplement: fig5-data2 [file elife-94605-fig5-data2-v1.zip]

erk

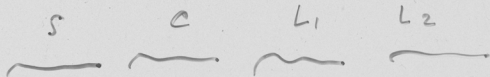

50

37

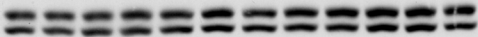

Supplement: fig5-data2 [file elife-94605-fig5-data2-v1.zip]

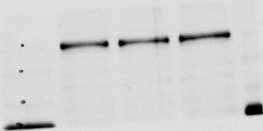

Supplement: fig5-data2 [file elife-94605-fig5-data2-v1.zip]

BC BC + mZki

37

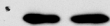

GAPDH

Supplement: fig5-data2 [file elife-94605-fig5-data2-v1.zip]

BC BC+MEK1

ERK

50

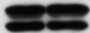

37

Supplement: fig5-data2 [file elife-94605-fig5-data2-v1.zip]

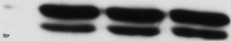

Supplement: fig5-data2 [file elife-94605-fig5-data2-v1.zip]

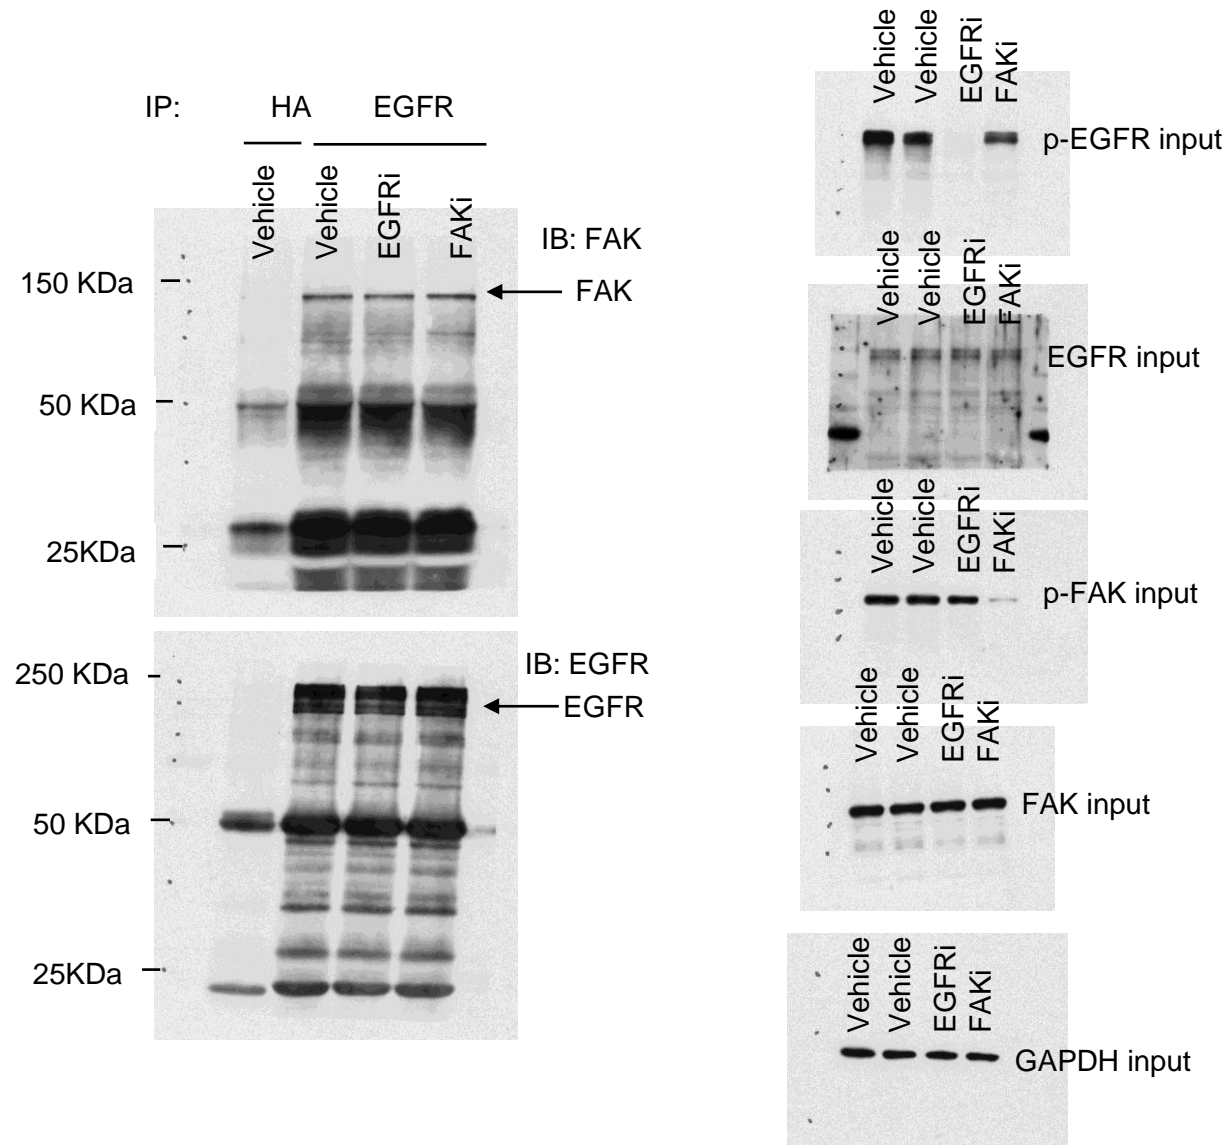

Supplement: fig5-figsupp1-data1 [file elife-94605-fig5-figsupp1-data1-v1.zip]

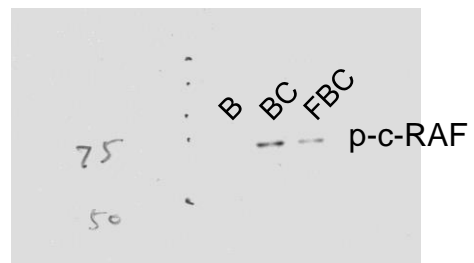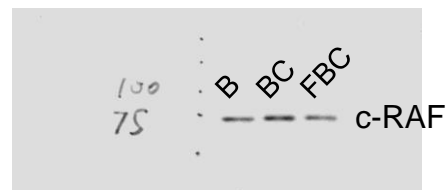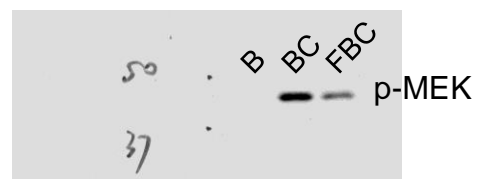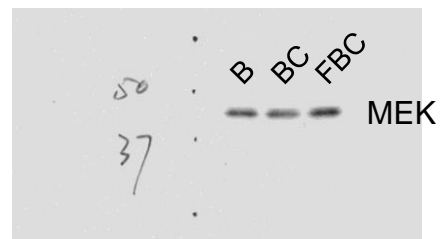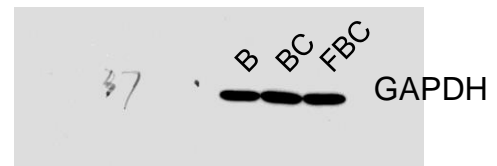

Supplement: fig5-figsupp1-data1 [file elife-94605-fig5-figsupp1-data1-v1.zip]

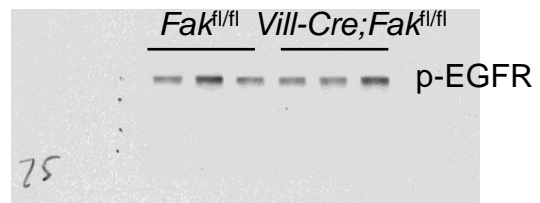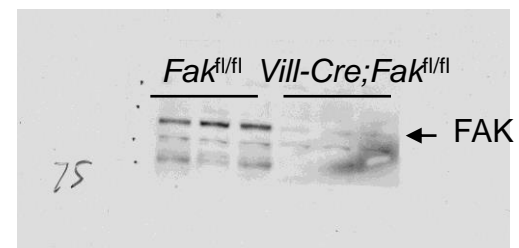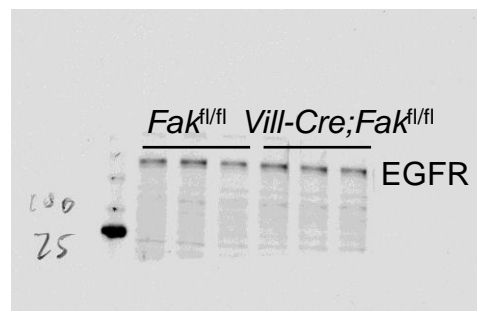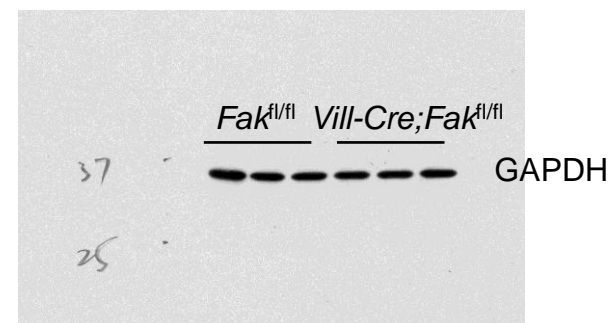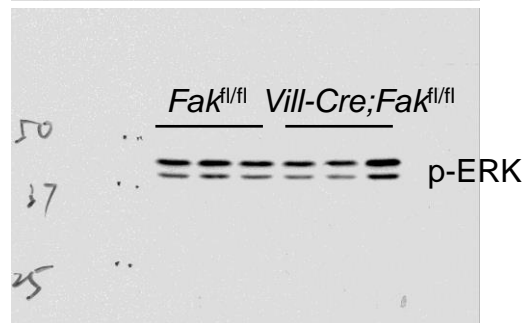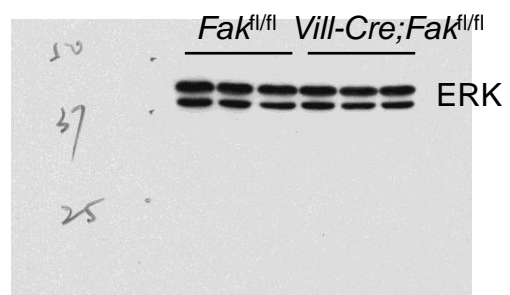

Supplement: fig5-figsupp1-data1 [file elife-94605-fig5-figsupp1-data1-v1.zip]

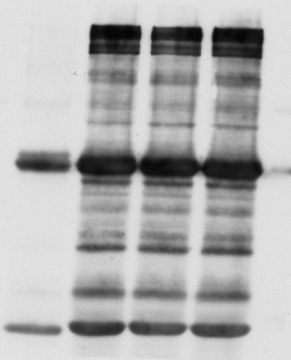

Supplement: fig5-figsupp1-data2 [file elife-94605-fig5-figsupp1-data2-v1.zip]

10

37

25

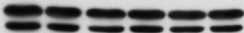

Supplement: fig5-figsupp1-data2 [file elife-94605-fig5-figsupp1-data2-v1.zip]

p-est  
1068

control  
-C

FC-C

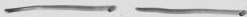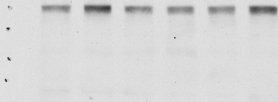

52

Supplement: fig5-figsupp1-data2 [file elife-94605-fig5-figsupp1-data2-v1.zip]

m E/C

50

37

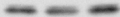

Supplement: fig5-figsupp1-data2 [file elife-94605-fig5-figsupp1-data2-v1.zip]

6032

total erk (p-erk stripped  
+ reblot)

3 13c 13c+estri 4h

50

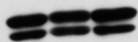

37

Supplement: fig5-figsupp1-data2 [file elife-94605-fig5-figsupp1-data2-v1.zip]

13 BC F13C

75

50

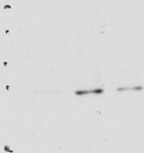

Supplement: fig5-figsupp1-data2 [file elife-94605-fig5-figsupp1-data2-v1.zip]

37

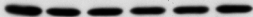

25

Supplement: fig5-figsupp1-data2 [file elife-94605-fig5-figsupp1-data2-v1.zip]

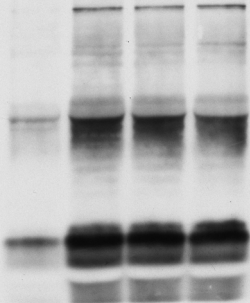

Supplement: fig5-figsupp1-data2 [file elife-94605-fig5-figsupp1-data2-v1.zip]

p-mek (17)

50

37

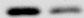

Supplement: fig5-figsupp1-data2 [file elife-94605-fig5-figsupp1-data2-v1.zip]

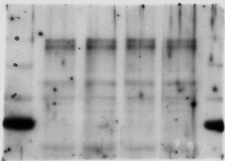

Supplement: fig5-figsupp1-data2 [file elife-94605-fig5-figsupp1-data2-v1.zip]

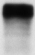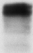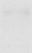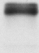

Supplement: fig5-figsupp1-data2 [file elife-94605-fig5-figsupp1-data2-v1.zip]

PAK

B BC BC+estr

75

50

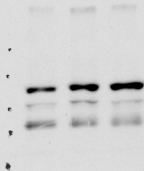

Supplement: fig5-figsupp1-data2 [file elife-94605-fig5-figsupp1-data2-v1.zip]

total estr

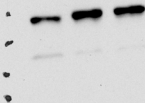

Supplement: fig5-figsupp1-data2 [file elife-94605-fig5-figsupp1-data2-v1.zip]

B Bc Bc + estri 4h

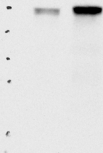

50

Supplement: fig5-figsupp1-data2 [file elife-94605-fig5-figsupp1-data2-v1.zip]

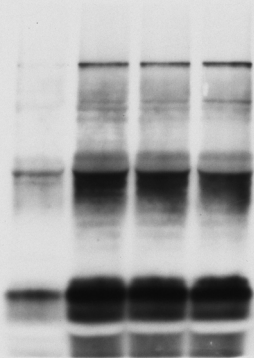

Supplement: fig5-figsupp1-data2 [file elife-94605-fig5-figsupp1-data2-v1.zip]

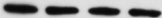

Supplement: fig5-figsupp1-data2 [file elife-94605-fig5-figsupp1-data2-v1.zip]

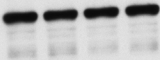

Supplement: fig5-figsupp1-data2 [file elife-94605-fig5-figsupp1-data2-v1.zip]

p-erk

B BC BC+estri  
4h

5

37

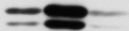

Supplement: fig5-figsupp1-data2 [file elife-94605-fig5-figsupp1-data2-v1.zip]

M 1789:45  
R 1789:45  
1789

MH B BC BC + Estr.

25 75

Q

25

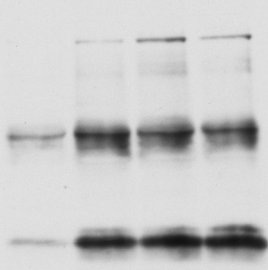

Supplement: fig5-figsupp1-data2 [file elife-94605-fig5-figsupp1-data2-v1.zip]

6225

GAPDH

Reblot 4-65-21

p-mgk(A)  
film

37

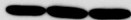

Supplement: fig5-figsupp1-data2 [file elife-94605-fig5-figsupp1-data2-v1.zip]

Control

FC-C

- C

—————

—————

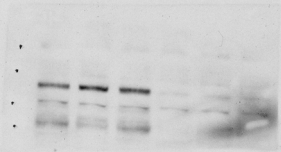

52

Supplement: fig5-figsupp1-data2 [file elife-94605-fig5-figsupp1-data2-v1.zip]

Ip: estr

211: estr

HA<sub>13C</sub>

B

13C

13C + estr

75

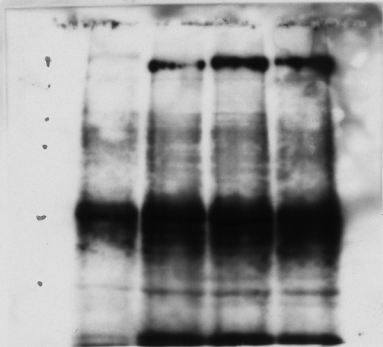

Supplement: fig5-figsupp1-data2 [file elife-94605-fig5-figsupp1-data2-v1.zip]

GAPDH

13 13C 13C + ctrl

(p-mk  
stripped  
reblot)

37

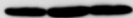

25

Supplement: fig5-figsupp1-data2 [file elife-94605-fig5-figsupp1-data2-v1.zip]

100

52

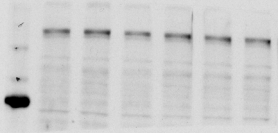

Supplement: fig5-figsupp1-data2 [file elife-94605-fig5-figsupp1-data2-v1.zip]

6225

p-mE(KLA)

50

37

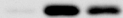

Supplement: fig5-figsupp1-data2 [file elife-94605-fig5-figsupp1-data2-v1.zip]

21: estr cm

25: p-estr 1068  
(K)

( estr/FAHC stripped  
and  
Reblot

HA

B

BC

BC+estri

Reblot

75

25

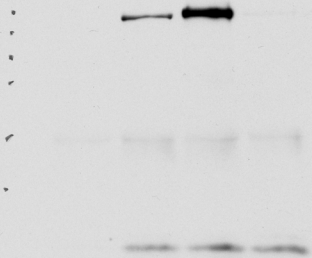

Supplement: fig5-figsupp1-data2 [file elife-94605-fig5-figsupp1-data2-v1.zip]

50

..

37

..

25

..

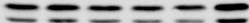

Supplement: fig5-figsupp1-data2 [file elife-94605-fig5-figsupp1-data2-v1.zip]

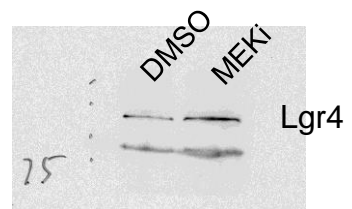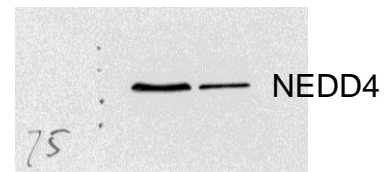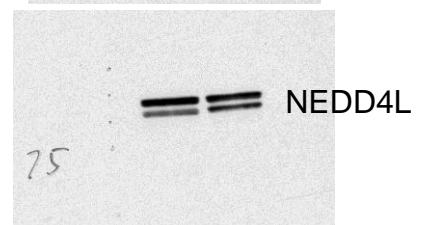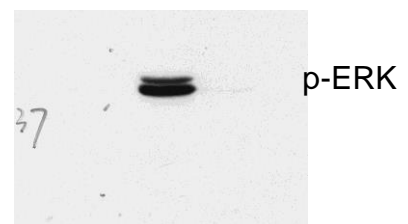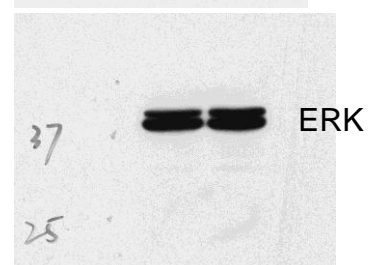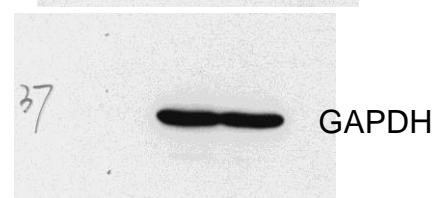

Supplement: fig6-data1 [file elife-94605-fig6-data1-v1.zip]

| IP    | Flag | LGR4 |
|-------|------|------|
| HA-Ub | +    | +    |
| MEKi  | -    | -    |
| MG132 | +    | +    |

250 KDa  
150 KDa  
100 KDa  
75 KDa  
50 KDa  
37 KDa  
25KDa

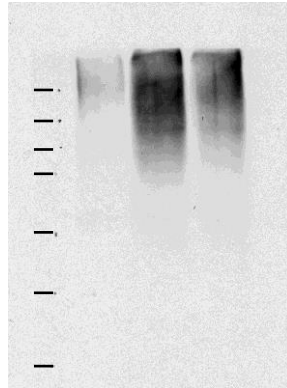

IB: Ub

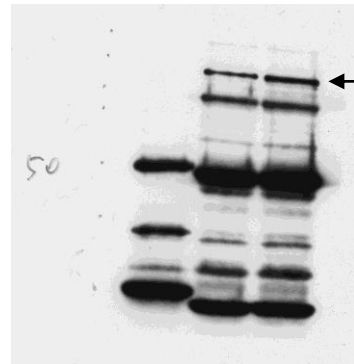

IB: LGR4

|       |   |   |   |
|-------|---|---|---|
| HA-Ub | + | + | + |
| MEKi  | - | - | + |
| MG132 | + | + | + |

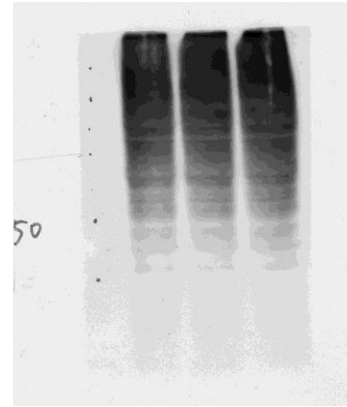

Ub input

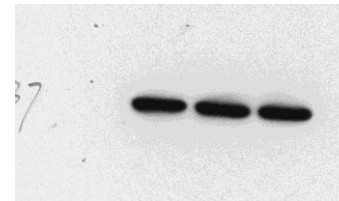

GAPDH input

Supplement: fig6-data1 [file elife-94605-fig6-data1-v1.zip]

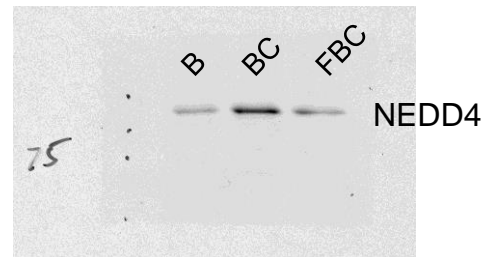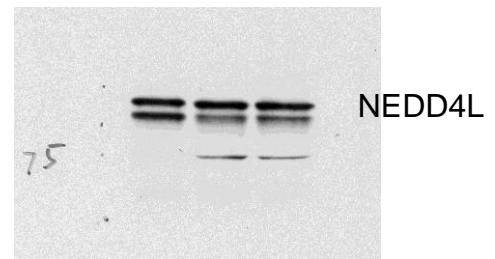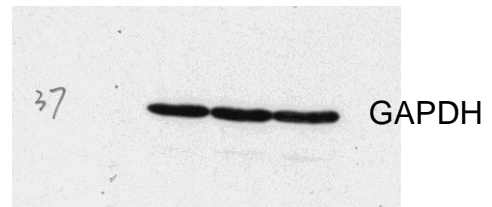

Supplement: fig6-data1 [file elife-94605-fig6-data1-v1.zip]

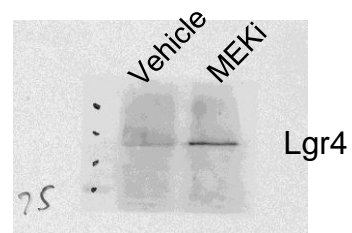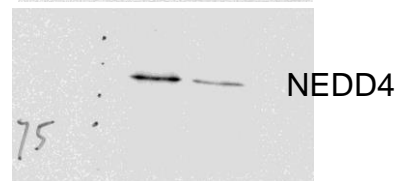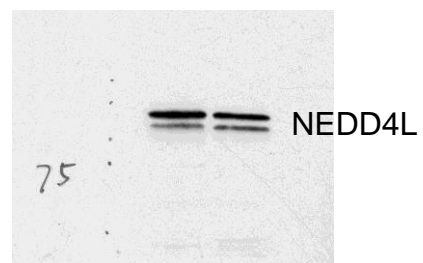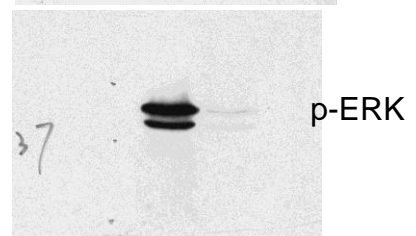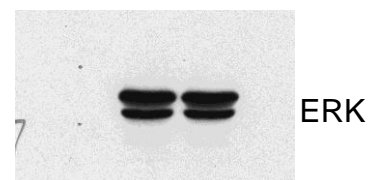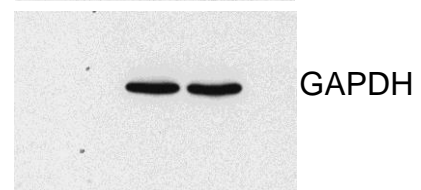

Supplement: fig6-data1 [file elife-94605-fig6-data1-v1.zip]

37.

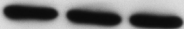

Supplement: fig6-data2 [file elife-94605-fig6-data2-v1.zip]

37

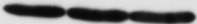

Supplement: fig6-data2 [file elife-94605-fig6-data2-v1.zip]

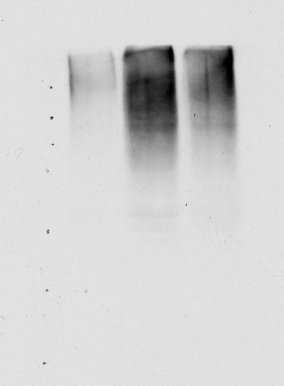

Supplement: fig6-data2 [file elife-94605-fig6-data2-v1.zip]

75

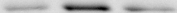

Supplement: fig6-data2 [file elife-94605-fig6-data2-v1.zip]

37

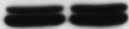

25

Supplement: fig6-data2 [file elife-94605-fig6-data2-v1.zip]

75

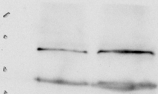

Supplement: fig6-data2 [file elife-94605-fig6-data2-v1.zip]

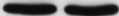

Supplement: fig6-data2 [file elife-94605-fig6-data2-v1.zip]

37

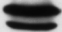

Supplement: fig6-data2 [file elife-94605-fig6-data2-v1.zip]

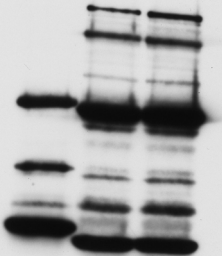

Supplement: fig6-data2 [file elife-94605-fig6-data2-v1.zip]

75

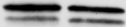

Supplement: fig6-data2 [file elife-94605-fig6-data2-v1.zip]

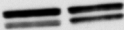

75

Supplement: fig6-data2 [file elife-94605-fig6-data2-v1.zip]

37

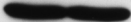

Supplement: fig6-data2 [file elife-94605-fig6-data2-v1.zip]

37

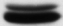

Supplement: fig6-data2 [file elife-94605-fig6-data2-v1.zip]

75

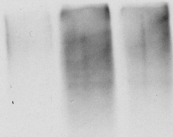

Supplement: fig6-data2 [file elife-94605-fig6-data2-v1.zip]

50

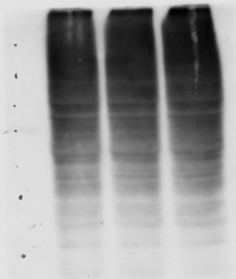

Supplement: fig6-data2 [file elife-94605-fig6-data2-v1.zip]

75

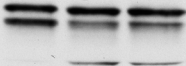

Supplement: fig6-data2 [file elife-94605-fig6-data2-v1.zip]

75

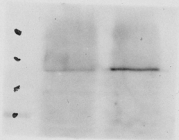

Supplement: fig6-data2 [file elife-94605-fig6-data2-v1.zip]

7

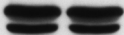

Supplement: fig6-data2 [file elife-94605-fig6-data2-v1.zip]

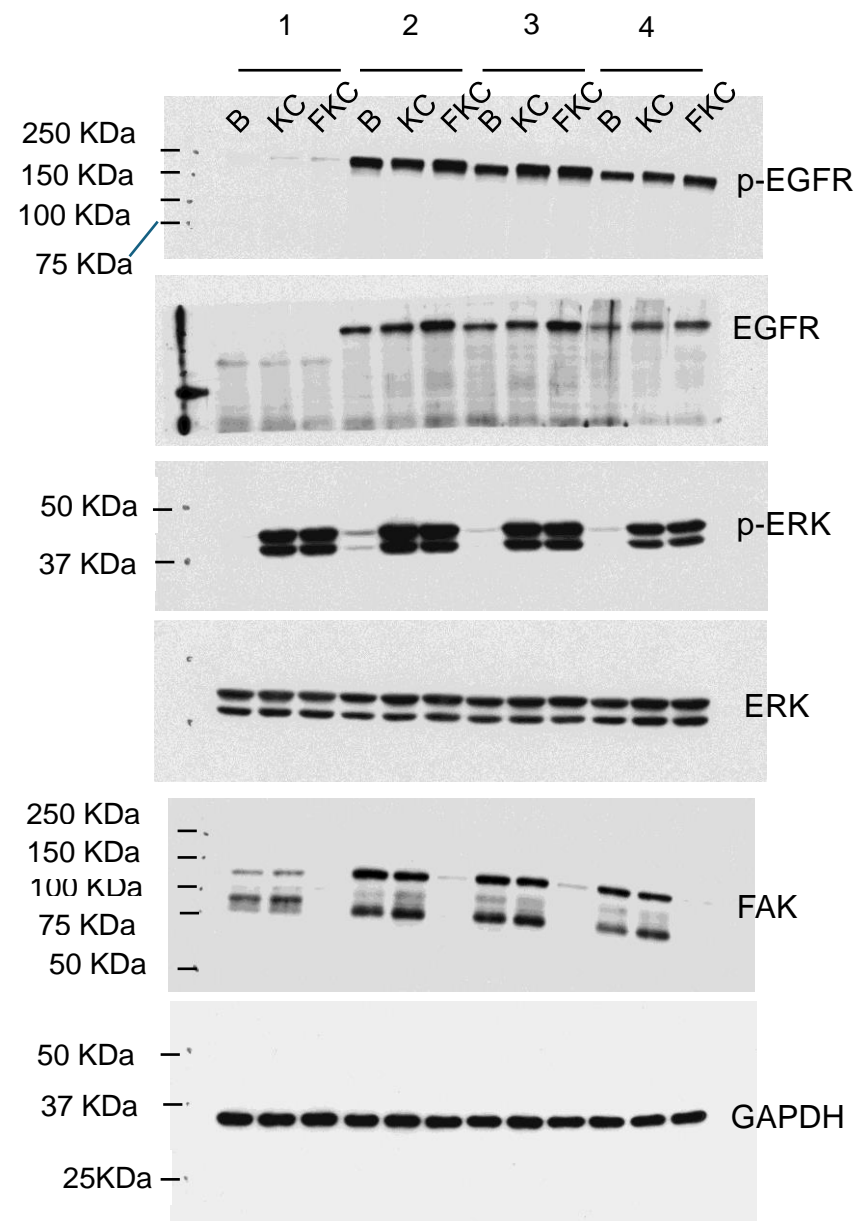

Supplement: fig7-data1 [file elife-94605-fig7-data1-v1.zip]

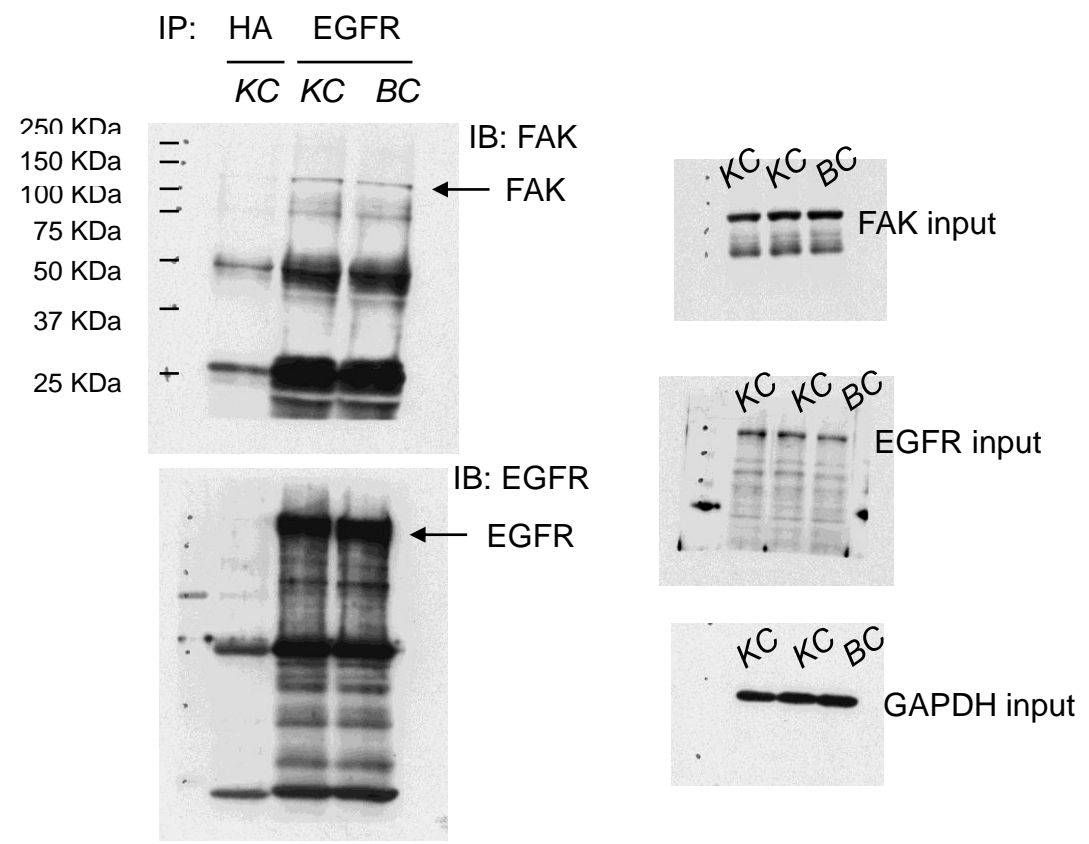

Supplement: fig7-data1 [file elife-94605-fig7-data1-v1.zip]
