# Supplementary figures and images for: FAK loss reduces BRAFV600E-induced ERK phosphorylation to promote intestinal stemness and cecal tumor formation (part 2 of 2)
Source: eLife journal article supplement (doi:10.7554/elife.94605), 2024-04-03

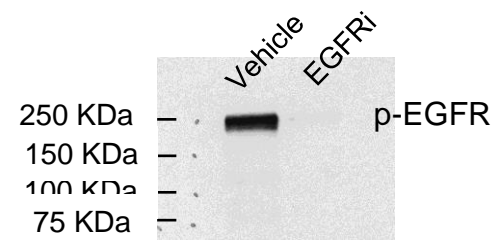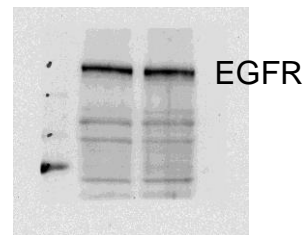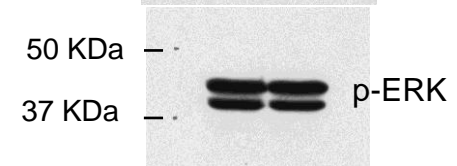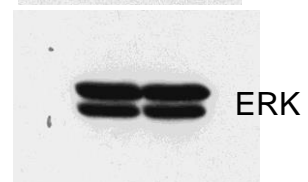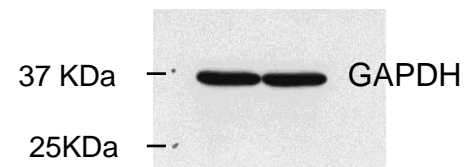

Supplement: fig7-data1 [file elife-94605-fig7-data1-v1.zip]

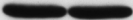

Supplement: fig7-data2 [file elife-94605-fig7-data2-v1.zip]

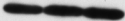

Supplement: fig7-data2 [file elife-94605-fig7-data2-v1.zip]

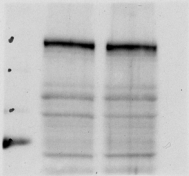

Supplement: fig7-data2 [file elife-94605-fig7-data2-v1.zip]

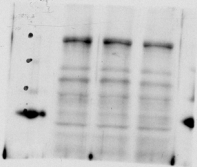

Supplement: fig7-data2 [file elife-94605-fig7-data2-v1.zip]

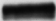

CONFIDENTIAL

Supplement: fig7-data2 [file elife-94605-fig7-data2-v1.zip]

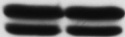

Supplement: fig7-data2 [file elife-94605-fig7-data2-v1.zip]

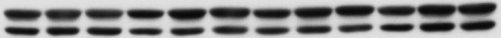

Supplement: fig7-data2 [file elife-94605-fig7-data2-v1.zip]

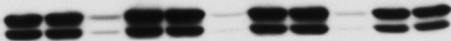

Supplement: fig7-data2 [file elife-94605-fig7-data2-v1.zip]

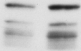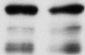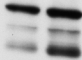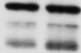

Supplement: fig7-data2 [file elife-94605-fig7-data2-v1.zip]

1  
2  
3  
4

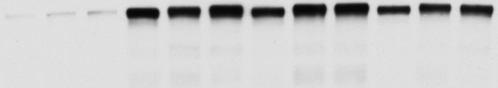

Supplement: fig7-data2 [file elife-94605-fig7-data2-v1.zip]

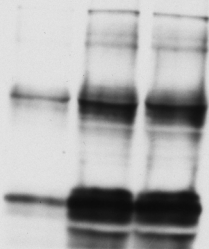

Supplement: fig7-data2 [file elife-94605-fig7-data2-v1.zip]

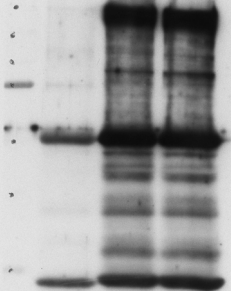

Supplement: fig7-data2 [file elife-94605-fig7-data2-v1.zip]

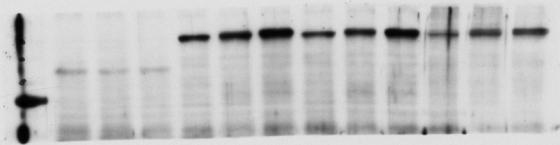

Supplement: fig7-data2 [file elife-94605-fig7-data2-v1.zip]

•

•

•

•

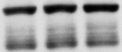

Supplement: fig7-data2 [file elife-94605-fig7-data2-v1.zip]

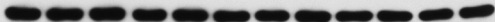

Supplement: fig7-data2 [file elife-94605-fig7-data2-v1.zip]

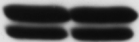

Supplement: fig7-data2 [file elife-94605-fig7-data2-v1.zip]
